# Supplementary material for: Amorphophallus konjac: Sensory Profile of This Novel Alternative Flour on Gluten-Free Bread
Source: MDPI journal article supplement (doi:10.3390/foods11101379), 2022-05-10
Supplement: s1 [file s1]

**Table S1.** Formulations of gluten-free bread with and without the addition of konjac flour [16].

| Ingredients                                   |                   | Control Bread | Bread 12.50%* | Bread 25%* | Bread 37.50%* | Bread 50%* |
|-----------------------------------------------|-------------------|---------------|---------------|------------|---------------|------------|
| <b>Control flour basis</b>                    | Potato starch (g) | 30            | 30            | 30         | 30            | 30         |
|                                               | Rice flour (g)    | 70            | 70            | 70         | 70            | 70         |
| Konjac flour (g/100g of control flour basis)  |                   | 0             | 14.3          | 33.3       | 60            | 100        |
| Crystal sugar (g/100g of control flour basis) |                   | 12            | 12            | 12         | 12            | 12         |
| Salt (g/100g of control flour basis)          |                   | 3             | 3             | 3          | 3             | 3          |
| Water (g/100g of control flour basis)         |                   | 34.5          | 131           | 228        | 297           | 406        |
| Soy oil (g/100g of control flour basis)       |                   | 16.5          | 16.5          | 16.5       | 16.5          | 16.5       |
| Whole Egg (g/100g of control flour basis)     |                   | 29.5          | 29.5          | 29.5       | 29.5          | 29.5       |
| Yeast (g/100g of control flour basis)         |                   | 1.5           | 1.7           | 2          | 2.4           | 3          |

\* The percentage value is related to the weight of the konjac flour in the total flour(potato starch + rice flour + konjac flour) amount.
